# Supplementary material
Source: publisher site journal article supplement (https://static.cambridge.org/content/id/urn:cambridge.org:id:article:S0043887116000265/resource/name/CUP-WPO-69-2_supp_mat-BustikovaCorduneanuHuci.pdf)
Supplement: Supplementary file 1 [file CUP-WPO-69-2_supp_mat-BustikovaCorduneanuHuci.pdf]

Supplementary Material. World Politics.

**Citation:**

Bustikova, Lenka, and Cristina Corduneanu-Huci. 2017. Supplementary material for "Patronage, Trust and State Capacity: The Historical Trajectories of Clientelism." At <https://doi.org/10.1017/S0043887116000265>.

**Table A1. List of countries included in the cross-national analysis, N = 88**

|            |             |              |             |                |
|------------|-------------|--------------|-------------|----------------|
| Albania    | Ecuador     | Kenya        | Norway      | Thailand       |
| Angola     | Egypt       | Korea, South | Pakistan    | Turkey         |
| Argentina  | El Salvador | Latvia       | Panama      | Ukraine        |
| Australia  | Estonia     | Lebanon      | Paraguay    | United Kingdom |
| Austria    | Finland     | Lithuania    | Peru        | Uruguay        |
| Bangladesh | France      | Macedonia    | Philippines | United States  |
| Belgium    | Germany     | Malaysia     | Poland      | Venezuela      |
| Benin      | Georgia     | Mali         | Portugal    | Zambia         |
| Bolivia    | Ghana       | Mauritius    | Romania     |                |
| Botswana   | Greece      | Mexico       | Russia      |                |
| Brazil     | Guatemala   | Moldova      | S. Africa   |                |
| Bulgaria   | Honduras    | Mongolia     | Senegal     |                |
| Canada     | Hungary     | Morocco      | Serbia      |                |
| Chile      | India       | Mozambique   | Slovakia    |                |
| Colombia   | Indonesia   | Namibia      | Slovenia    |                |
| Costa Rica | Ireland     | Netherlands  | Spain       |                |
| Croatia    | Israel      | New Zealand  | Sweden      |                |
| Czech Rep. | Italy       | Nicaragua    | Switzerland |                |
| Denmark    | Japan       | Niger        | Taiwan      |                |
| Dom. Rep.  | Jamaica     | Nigeria      | Tanzania    |                |

Table A2. Variable Description for National Level Analysis

| Variable Name                      | Variable Description                                                                                                                                                      |
|------------------------------------|---------------------------------------------------------------------------------------------------------------------------------------------------------------------------|
| <i>Clientelistic exchange</i>      | Cross-national aggregate measure of clientelistic exchange. Source: Kitschelt et al., 2010. Democratic Accountability Project.                                            |
| <i>Government Effectiveness</i>    | Country level of public good provision. Government Effectiveness (2008). Source: World Governance Indicator, World Bank.                                                  |
| <i>Historical State Capacity</i>   | Infant Mortality Rates around 1925. Source: Data are combined from Abouharb and Kimball (2007) dataset and historical data on IMR collected by the authors.               |
| <i>Trust</i>                       | Interpersonal trust. Percentage of respondents who agree, “most people can be trusted”. Source: World Value Survey.                                                       |
| <i>Wealth</i>                      | Current wealth. GDP PC (2002). Source: World Development Indicators, World Bank.                                                                                          |
| <i>Democratic Longevity</i>        | Democratic Stock. Source: Gerring et al., 2005.                                                                                                                           |
| <i>Political Regime (Polity)</i>   | Polity IV index of democracy. Source: Polity IV project.<br><a href="http://www.systemicpeace.org/polity/polity4.htm">http://www.systemicpeace.org/polity/polity4.htm</a> |
| <i>Party Fractionalization</i>     | Party Fractionalization Index. Source: CSES, 2010.                                                                                                                        |
| <i>Religious Fractionalization</i> | Index of religious fractionalization. Alesina 2003.                                                                                                                       |
| <i>No. of Regime Transitions</i>   | Total number of regime transitions to and from democracy. Source: Cheibub, Gandhi and Vreeland, 2010.                                                                     |
| <i>Latitude</i>                    | Absolute value of the latitude of the country divided by 90 (to take values between 0 and 1).                                                                             |
| <i>British Colonial Origin</i>     | Indicator of the British Colonial Origin. Source: La Porta et al. 1999.                                                                                                   |

*Colonial Legacies*

Western oversees colonialism. Classification of the former Western colonial ruler: the last colonizers whose rule lasted for more than ten years. Source: Hadenius and Teorell, 2007.

*Horizontal Health Inequality (1992-2002)*

This is a variable computed by authors based on two concentration indexes developed from household surveys as measures of socioeconomic inequalities of IMR in developing countries, and of public healthcare use across regions in developed countries. The scores represent Lorenz curve deviations from infant mortality rates and public healthcare use rates associated with specific income quintiles for non-OECD countries, and with income quintiles and geographical regions for OECD countries. Positive values imply skewed healthcare outcomes benefitting the rich; negative values – inequalities benefitting the poor. Source: Authors, based on Van Doorslaer and Masseria 2004, Wagstaff 2002.

*Historical Relative Political Extraction (1960-1970)*

Composite indicator that “approximates the ability of governments to appropriate portions of the national output to advance public goals”. It is averaged between 1960 and 1970. Source: Relative Political Capacity Project. Dataset from Kugler & Tammen, 2012. Relative Political Performance Data Set Documentation 2013: 11.

*Relative Political Allocation (2007-2009)*

Composite indicator that measures how public expenditures are prioritized in the government budget and reflects on the ability of states to optimally allocate resources that contribute to public goods provision. It evaluates the share of public revenues provided to competing national priorities contrasted to the optimal allocation based on maximizing economic growth. We use RPA that is calculated from four different results of income level-specific group regression. Source: Relative Political Capacity Project, Kugler & Tammen, 2012. Relative Political Performance Data Set Documentation 2013: 13-17.

### *Clientelistic exchange*

The variable captures the degree to which parties engage in clientelistic goods provision. It is a cross-national measure of clientelistic exchange based on an expert survey. The survey assesses the prevalence of clientelistic goods provision in exchange for votes between individual parties and voters in 88 countries. The country-level measure is comprised of five types of exchanges on a four-point ordinal Likert scale (1-negligible effort; 4-high effort): (1) to distribute consumer goods, (2) to give preferential access to social policy entitlements, (3) to give employment in the public sector, (4) to give preferential access to public contracts, and (5) to give influence over regulatory proceedings. Higher levels indicate that more private goods are being targeted to narrow electoral constituencies, i.e., that there are high levels of clientelism.

The aggregate level of clientelism is weighted by vote shares of individual political parties in a country. Adding these five individual measures of political accountability yields a minimal value on the un-weighted composite measure of five, and a maximum value of twenty. Higher levels indicate more widespread practice of clientelistic exchange. The weighted national-level measure of accountability is weighted by the electoral support of the political party  $k$  in legislative elections. The empirical values of *Clientelistic Exchange* range between six and eighteen and have a mean value of thirteen. The range for developed countries is 5.79 to 15.06; for developing countries: 10.55 to 18.53.

We use the composite indicator b15nwe (see the Codebook for the Dataset) as our dependent variable. b15nwe is obtained as a national mean of b15, weighted by b.3.1 (average electoral support received in legislative elections  $t$  and  $t-1$  by party  $k$ ):

$$b15nwe = \frac{\sum b3.1_k \times b15_k}{\sum b3.1_k}.$$

Sources:

Kitschelt, Herbert, Kent Freeze, Kiril Kolev, and Yi-Ting Wang. 2009. "Measuring Democratic Accountability: An Initial Report on an Emerging Data Set." *Revista de Ciencia Política* 29, no. 3: 741-773.

Democratic Accountability Project. 2009. Kitschelt, Herbert. 2010. Democratic Accountability and Citizen-Politician Linkages around the World. Duke University. At: <https://web.duke.edu/democracy/index.html>. Documentation and Codebook: <http://sites.duke.edu/democracylinkage/>.

**Table A3. Variable Description for Individual Level Analysis**

| Variable Name                                  | Variable Description                                                                                                                                                                                                                                                                                                                                                                                                                                                 |
|------------------------------------------------|----------------------------------------------------------------------------------------------------------------------------------------------------------------------------------------------------------------------------------------------------------------------------------------------------------------------------------------------------------------------------------------------------------------------------------------------------------------------|
| <i>Clientelistic exchange before elections</i> | “In your view, how often are voters bribed in this country’s elections?” Respondents had to rank their answer on a scale from 1 (not often at all) to 4 (very often).                                                                                                                                                                                                                                                                                                |
| <i>Trust in Civil Service</i>                  | “(…) could you tell me how much confidence you have in the civil service: is it a great deal of confidence, quite a lot of confidence, not very much confidence, or none at all?” The question asked respondents to rank their level of confidence on a scale from 1 (none at all) to 4 (a great deal).                                                                                                                                                              |
| <i>Income</i>                                  | “On this card is an income scale on which 1 indicates the lowest income group and 10 the highest income group in your country. We would like to know in what group your household is. Please, specify the appropriate number, counting all wages, salaries, pensions and other incomes that come in.”                                                                                                                                                                |
| <i>Education</i>                               | “What is the highest educational level that you have attained?” (1 – No formal education; 2 – Incomplete primary school; 3- Complete primary school; 4- Incomplete secondary school (vocational); 5-- Complete secondary school (vocational); 6- Incomplete secondary school (university - preparatory); 7- Complete secondary school (university – preparatory); 8 – Some university-level education, without degree; 9 – University- level education, with degree. |
| <i>Age</i>                                     | “(…) you are ____years old (write in age in two digits).”                                                                                                                                                                                                                                                                                                                                                                                                            |
| <i>Sex</i>                                     | Male (1), female (0).                                                                                                                                                                                                                                                                                                                                                                                                                                                |
| <i>Public sector</i>                           | “Are you working for the government or public institution, for private business or industry, or for a private non-profit organization? If you do not work currently, characterize your major work in the past! Do you or did you work for: 1- Government or public institution; 0 – Otherwise.”                                                                                                                                                                      |
| <i>Unemployed</i>                              | “Are you employed now or not? 1- Unemployed; 0 – Employed”                                                                                                                                                                                                                                                                                                                                                                                                           |
| <i>Political ideology</i>                      | “In political matters, people talk of “the left” and “the right.” How would you place your views on this scale, generally speaking?” Respondents located themselves between 1 (left) to 10 (right).                                                                                                                                                                                                                                                                  |
| <i>Level of development Wealth</i>             | Log (GDP per capita) (purchasing power parity USD), 2002. World Development Indicators.                                                                                                                                                                                                                                                                                                                                                                              |

**Table A4. Summary statistics**

| <b>Variables</b>                                | <b>Observations</b> | <b>Mean</b> | <b>S.D.</b> | <b>Min.</b> | <b>Max.</b> |
|-------------------------------------------------|---------------------|-------------|-------------|-------------|-------------|
| <i>Clientelistic Exchange</i>                   | 88                  | 13.32       | (3.34)      | 5.79        | 18.47       |
| <i>Government Effectiveness</i>                 | 88                  | .34         | (.94)       | -1.16       | 2.24        |
| <i>Trust</i>                                    | 85                  | 27.57       | (20.47)     | 2.89        | 83.60       |
| <i>Historical State Capacity (log)</i>          | 62                  | 4.83        | (.44)       | 3.78        | 5.42        |
| <i>Wealth (log)</i>                             | 88                  | 8.61        | (1.06)      | 6.17        | 10.26       |
| <i>Democratic Stock</i>                         | 88                  | 70.63       | (306.02)    | -348.77     | 637.63      |
| <i>Polity IV</i>                                | 88                  | 7.58        | (3.40)      | -6.00       | 10.00       |
| <i>Religious Fractionalization</i>              | 88                  | .36         | (.22)       | .02         | .78         |
| <i>Party Fractionalization</i>                  | 88                  | .75         | (.13)       | .37         | .96         |
| <i>Regime Transition</i>                        | 88                  | 1.31        | (1.94)      | .00         | 9.00        |
| <i>Latitude</i>                                 | 88                  | .35         | (.20)       | .01         | .71         |
| <i>British Colonial Origin</i>                  | 88                  |             |             | 0           | 1           |
| <i>Colonial Legacies</i>                        | 88                  |             |             | 0           | 1           |
| <i>Horizontal Health Inequality</i>             | 46                  | .07         | (.08)       | -.04        | .25         |
| <i>Historical Relative Political Extraction</i> | 67                  | .88         | (.31)       | .34         | 1.65        |
| <i>Relative Political Allocation</i>            | 52                  | 1.16        | (.27)       | .66         | 1.76        |
| <b>Variables – Individual Level Analysis</b>    |                     |             |             |             |             |
| <i>Clientelism</i>                              | 41,205              | 2.44        | (1.08)      | 1           | 4           |
| <i>Trust in Civil Service</i>                   | 69,453              | 2.42        | (.88)       | 1           | 4           |
| <i>Income</i>                                   | 71,425              | 4.90        | (2.08)      | 1           | 10          |
| <i>Education</i>                                | 73,311              | 5.76        | (2.41)      | 1           | 9           |
| <i>Age</i>                                      | 73,909              | 42.29       | (16.73)     | 16          | 99          |
| <i>Sex</i>                                      | 73,988              | 1.53        | (.50)       | 1           | 2           |
| <i>Sector</i>                                   | 57,550              | 1.91        | (.82)       | 1           | 4           |
| <i>Employment</i>                               | 73,694              | 3.29        | (2.10)      | 1           | 8           |
| <i>Ideology</i>                                 | 54,501              | 5.73        | (2.31)      | 1           | 10          |

Figure A1. Comparison of OLS Regression Analysis and Instrumental Variables Analysis

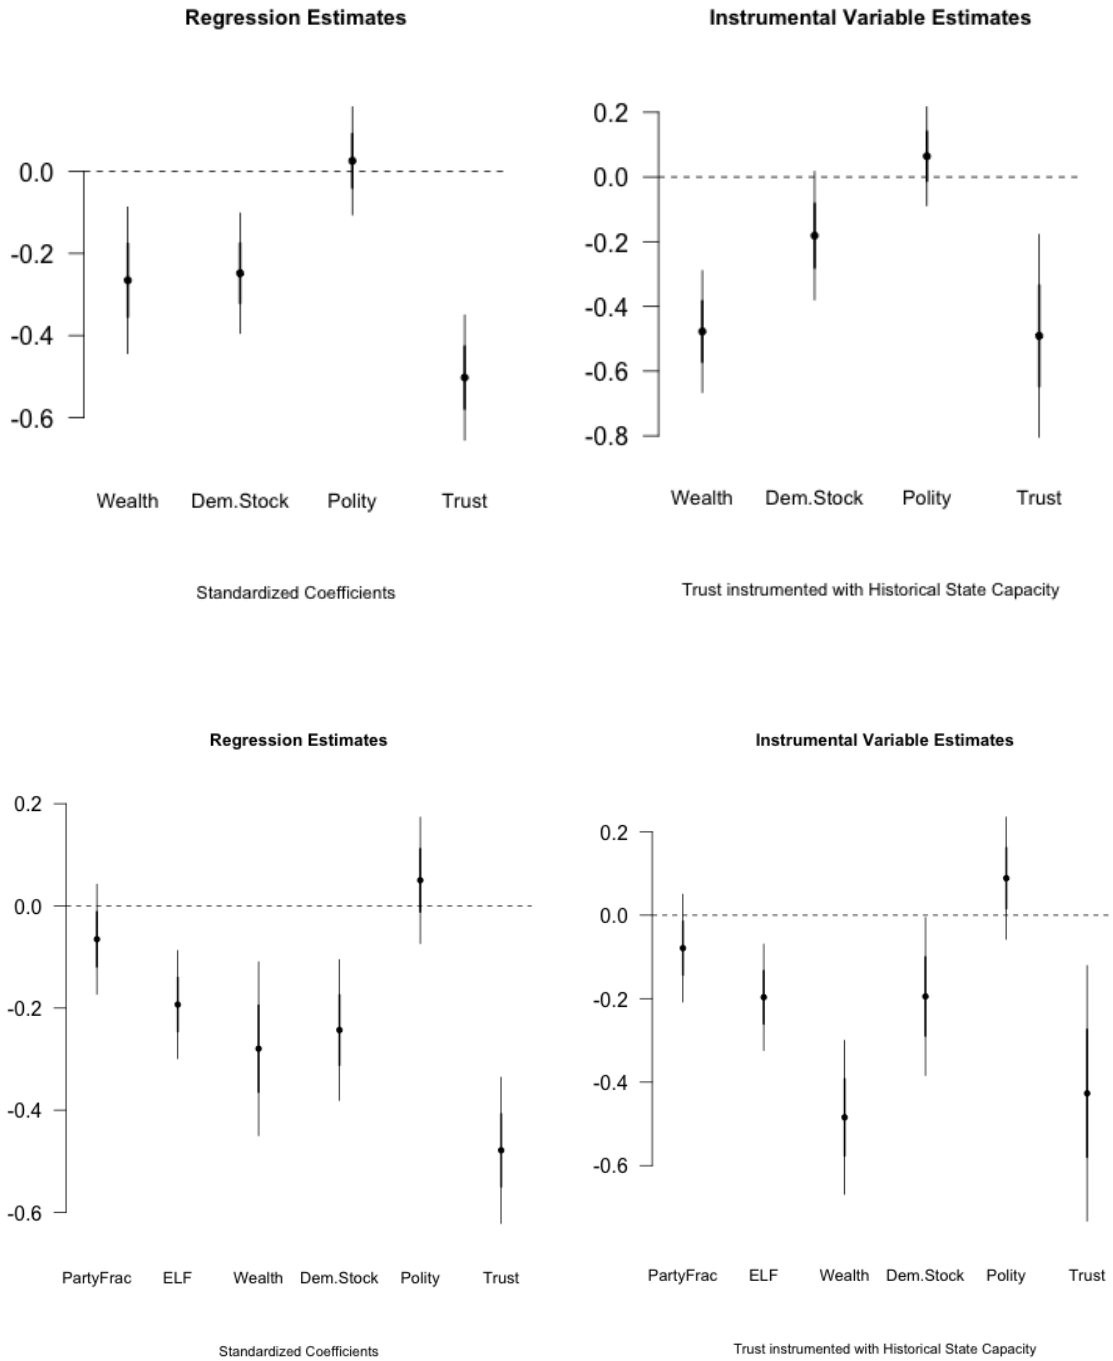

Dependent Variable: Clientelistic Exchange (Source: Democratic Accountability Project)

Figure shows the comparison between an OLS regression analysis and 2SLS regression using standardized coefficients.



## Cross-national aggregate measure of clientelistic exchange

| <b>Clientelism Score</b> | <b>Country</b>     |
|--------------------------|--------------------|
| 13.97                    | Albania            |
| 15.88                    | Angola             |
| 16.98                    | Argentina          |
| 8.13                     | Australia          |
| 9.27                     | Austria            |
| 14.80                    | Bangladesh         |
| 9.35                     | Belgium            |
| 14.05                    | Benin              |
| 15.23                    | Bolivia            |
| 11.28                    | Botswana           |
| 15.30                    | Brazil             |
| 15.81                    | Bulgaria           |
| 5.79                     | Canada             |
| 12.22                    | Chile              |
| 15.70                    | Colombia           |
| 12.66                    | Costa Rica         |
| 13.56                    | Croatia            |
| 10.63                    | Czech Republic     |
| 6.30                     | Denmark            |
| 17.93                    | Dominican Republic |
| 16.49                    | Ecuador            |
| 17.69                    | Egypt              |
| 15.76                    | El Salvador        |
| 11.49                    | Estonia            |
| 7.98                     | Finland            |
| 9.36                     | France             |
| 13.98                    | Georgia            |
| 6.65                     | Germany            |
| 16.38                    | Ghana              |
| 12.32                    | Greece             |
| 15.59                    | Guatemala          |
| 16.46                    | Honduras           |
| 14.85                    | Hungary            |
| 15.68                    | India              |
| 14.81                    | Indonesia          |
| 9.24                     | Ireland            |
| 12.19                    | Israel             |
| 12.64                    | Italy              |
| 16.17                    | Jamaica            |

|       |                    |
|-------|--------------------|
| 12.21 | Japan              |
| 16.30 | Kenya              |
| 12.13 | Korea, Republic Of |
| 10.52 | Latvia             |
| 17.88 | Lebanon            |
| 14.44 | Lithuania          |
| 16.69 | Macedonia, FYR     |
| 12.30 | Malaysia           |
| 16.08 | Mali               |
| 16.63 | Mauritius          |
| 15.78 | Mexico             |
| 13.93 | Moldova            |
| 18.48 | Mongolia           |
| 13.65 | Morocco            |
| 12.88 | Mozambique         |
| 14.49 | Namibia            |
| 6.47  | Netherlands        |
| 8.87  | New Zealand        |
| 16.46 | Nicaragua          |
| 15.32 | Niger              |
| 15.05 | Nigeria            |
| 6.10  | Norway             |
| 14.20 | Pakistan           |
| 17.28 | Panama             |
| 17.58 | Paraguay           |
| 13.51 | Peru               |
| 17.32 | Philippines        |
| 11.78 | Poland             |
| 12.15 | Portugal           |
| 14.64 | Romania            |
| 12.86 | Russia             |
| 18.05 | Senegal            |
| 13.50 | Serbia             |
| 11.22 | Slovak Republic    |
| 10.89 | Slovenia           |
| 12.38 | South Africa       |
| 11.34 | Spain              |
| 6.90  | Sweden             |
| 6.48  | Switzerland        |
| 15.07 | Taiwan             |
| 16.47 | Tanzania           |
| 13.29 | Thailand           |
| 17.74 | Turkey             |

|       |                |
|-------|----------------|
| 14.41 | Ukraine        |
| 6.39  | United Kingdom |
| 10.10 | United States  |
| 11.64 | Uruguay        |
| 16.99 | Venezuela      |
| 15.11 | Zambia         |

Source: Kitschelt et al., 2010. Democratic Accountability Project.

Kitschelt, Herbert. 2010. Democratic Accountability and Citizen-Politician Linkages around the World. Duke University. At: <https://web.duke.edu/democracy/index.html>.

Documentation and Codebook: <http://sites.duke.edu/democracylinkage/>.

## Infant Mortality Rates, Suffrage and Horizontal Health Inequality

| Country            | Suffrage | IMR | IMR (m) | Health |
|--------------------|----------|-----|---------|--------|
| Albania            | 1920     | 143 | 1       |        |
| Angola             | 1975     |     | 0       |        |
| Argentina          | 1947     | 121 | 1       |        |
| Australia          | 1962     | 53  | 1       | -0.014 |
| Austria            | 1918     | 119 | 1       | -0.002 |
| Bangladesh         | 1972     |     | 0       | 0.0669 |
| Belgium            | 1948     | 100 | 1       | -0.006 |
| Bolivia            | 1952     |     | 0       | 0.2107 |
| Botswana           | 1965     |     | 0       |        |
| Brazil             | 1932     | 171 | 1       | 0.251  |
| Bulgaria           | 1944     | 152 | 1       |        |
| Canada             | 1918     | 93  | 1       | 0.004  |
| Chile              | 1931     | 226 | 1       |        |
| Taiwan             | 1947     | 142 | 1       |        |
| Colombia           | 1957     | 122 | 1       | 0.1207 |
| Costa Rica         | 1949     | 178 | 1       |        |
| Croatia            | 1945     | 143 | 1       |        |
| Czech Republic     | 1920     | 142 | 1       |        |
| Benin              | 1956     |     | 0       | 0.0799 |
| Denmark            | 1915     | 80  | 1       | -0.026 |
| Dominican Republic | 1942     |     | 0       | 0.1689 |
| Ecuador            | 1929     | 167 | 1       |        |
| El Salvador        | 1939     | 191 | 1       |        |
| Estonia            | 1917     | 119 | 1       |        |
| Finland            | 1906     | 85  | 1       | 0.026  |
| France             | 1945     | 95  | 1       | 0.005  |
| Georgia            | 1919     | 219 | 1       |        |
| Germany            | 1918     | 105 | 1       | -0.005 |
| Ghana              | 1954     |     | 0       | 0.0929 |
| Greece             | 1952     | 90  | 1       | -0.035 |
| Guatemala          | 1946     | 123 | 1       | 0.0818 |
| Honduras           | 1954     | 112 | 1       |        |
| Hungary            | 1945     | 168 | 1       | -0.007 |
| India              | 1950     | 167 | 1       | 0.1488 |
| Indonesia          | 1945     | 225 | 1       | 0.1954 |
| Ireland            | 1918     | 68  | 1       | -0.02  |
| Israel             | 1948     |     | 0       |        |
| Italy              | 1925     | 119 | 1       | 0.008  |
| Jamaica            | 1944     | 162 | 1       |        |
| Japan              | 1945     | 142 | 1       |        |

| Country         | Suffrage | IMR   | IMR (m) | Health |
|-----------------|----------|-------|---------|--------|
| Kenya           | 1963     |       | 0       | 0.1533 |
| South Korea     | 1948     |       | 0       |        |
| Lebanon         | 1957     |       | 0       |        |
| Latvia          | 1918     | 96    | 1       |        |
| Lithuania       | 1918     | 167   | 1       |        |
| Malaysia        | 1957     | 147   | 1       |        |
| Mali            | 1956     |       | 0       | 0.0752 |
| Mauritius       | 1956     | 212   | 1       |        |
| Mexico          | 1953     | 216   | 1       | 0.029  |
| Mongolia        | 1924     | 219   | 1       |        |
| Moldova         | 1940     | 205.5 | 1       |        |
| Morocco         | 1963     |       | 0       | 0.1165 |
| Mozambique      | 1975     |       | 0       | 0.1156 |
| Namibia         | 1989     |       | 0       | 0.0028 |
| Netherlands     | 1919     | 58    | 1       | -0.003 |
| New Zealand     | 1919     | 44    | 1       |        |
| Nicaragua       | 1955     |       | 0       | 0.0939 |
| Niger           | 1948     |       | 0       | 0.0504 |
| Nigeria         | 1958     |       | 0       |        |
| Norway          | 1913     | 50    | 1       | -0.003 |
| Pakistan        | 1947     |       | 0       | 0.0511 |
| Panama          | 1941     | 110   | 1       |        |
| Paraguay        | 1961     |       | 0       |        |
| Peru            | 1955     |       | 0       | 0.2224 |
| Philippines     | 1937     | 139   | 1       | 0.1564 |
| Poland          | 1918     | 151   | 1       |        |
| Portugal        | 1934     | 132   | 1       | 0.011  |
| Romania         | 1946     | 192   | 1       |        |
| Russia          | 1917     | 219   | 1       |        |
| Senegal         | 1945     |       | 0       | 0.1125 |
| Slovak Republic | 1920     | 142   | 1       |        |
| Slovenia        | 1945     | 143   | 1       |        |
| South Africa    | 1930     | 68    | 1       |        |
| Spain           | 1931     | 137   | 1       | -0.008 |
| Sweden          | 1921     | 56    | 1       | -0.003 |
| Switzerland     | 1975     | 58    | 1       | -0.005 |
| Thailand        | 1932     |       | 0       |        |
| Turkey          | 1934     |       | 0       | 0.1883 |
| Ukraine         | 1918     | 204   | 1       |        |
| Macedonia, FYR  | 1945     | 143   | 1       |        |
| Egypt           | 1956     | 128   | 1       | 0.2161 |
| United Kingdom  | 1928     | 83    | 1       | -0.019 |
| Tanzania        | 1959     |       | 0       | 0.0403 |
| United States   | 1920     | 89.5  | 1       | 0.023  |

|           |      |     |   |        |
|-----------|------|-----|---|--------|
| Uruguay   | 1917 | 115 | 1 |        |
| Venezuela | 1946 | 138 | 1 |        |
| Serbia    | 1945 | 143 | 1 |        |
| Zambia    | 1962 |     | 0 | 0.0952 |

*Note:*

Suffrage: Year of women's suffrage

IMR: Historical Infant Mortality Rates around 1925

IMR (m): Historical Infant Mortality Rates, missing data

Health: Horizontal Health Inequalities (1992-2002)
